# Supplementary material for: HPV vaccination to prevent recurrence of anal intraepithelial neoplasia in HIV+ MSM
Source: PubMed Central journal article supplement — AIDS. 2021 May 6;35(11):1753–64. doi: 10.1097/QAD.0000000000002928 (PMC8373452; doi:10.1097/qad.0000000000002928), 2021-05-06
Supplement: aids-35-1753-s002.pdf [file aids-35-1753-s002.pdf]

**Supplementary table 7: Adverse events**

|                           | <b>qHPV (n=64)</b> | <b>Placebo (n=62)</b> | <b>p-value</b> |
|---------------------------|--------------------|-----------------------|----------------|
| <b>None</b>               | 6 (9.4%)           | 7 (11.3%)             | 0.78           |
| <b>Any</b>                | 58 (90.6%)         | 55 (88.7%)            | 0.72           |
| - Vaccine-related‡        | 43 (67.2%)         | 38 (61.3%)            | 0.49           |
| <b>At injection site*</b> | 24 (37.5%)         | 10 (16.1%)            | <b>0.007</b>   |
| <b>Systemic</b>           | 57 (89.1%)         | 54 (87.1%)            | 0.73           |
| - Vaccine-related‡        | 36 (56.3%)         | 34 (54.8%)            | 0.87           |
| <b>Serious</b>            | 3 (4.7%)           | 4 (6.5%)              | 0.72           |
| - Vaccine-related‡        | 0 (0%)             | 0 (0%)                | -              |
| - Death                   | 0 (0%)             | 0 (0%)                | -              |

Numbers are n, (%) for participants having experienced at least one AE within the category. Abbreviations:

qHPV, quadrivalent human papillomavirus vaccine

\* pain, erythema, swelling during the seven days following vaccination; all injection site adverse experiences were considered vaccine-related.

‡ Determined by the investigator to be possibly, probably, or definitely related to the vaccine.
