# Supplementary material for: HPV vaccination to prevent recurrence of anal intraepithelial neoplasia in HIV+ MSM
Source: PubMed Central journal article supplement — AIDS. 2021 May 6;35(11):1753–64. doi: 10.1097/QAD.0000000000002928 (PMC8373452; doi:10.1097/qad.0000000000002928), 2021-05-06
Supplement: aids-35-1753-s003.pdf [file aids-35-1753-s003.pdf]

**Supplementary table 8: Breakdown of adverse events reported during the study**

| Adverse event                     | qHPV                   |                        | Placebo                  |                     | Total                  |                        |
|-----------------------------------|------------------------|------------------------|--------------------------|---------------------|------------------------|------------------------|
|                                   | All AE                 | Vaccine-related AE‡    | All AE                   | Vaccine-related AE‡ | All AE                 | Vaccine-related AE‡    |
| <b>Total</b>                      | <b>251<br/>(53.7%)</b> | <b>115<br/>(45.8%)</b> | <b>216<br/>(46.3%)</b>   | <b>82 (38.0%)</b>   | <b>467<br/>(100%)</b>  | <b>197<br/>(42.2%)</b> |
| <b>Injection-site related*</b>    | <b>49 (19.5%)</b>      | <b>49 (100%)</b>       | <b>13 (6.0%)</b>         | <b>13 (100%)</b>    | <b>62 (13.3%)</b>      | <b>62 (100%)</b>       |
| - Pain                            | 37 (14.7%)             | 37 (100%)              | 10 (4.6%)                | 10 (100%)           | 47 (10.0%)             | 47 (100%)              |
| - Erythema                        | 6 (2.4%)               | 6 (100%)               | 3 (1.4%)                 | 3 (100%)            | 9 (1.9%)               | 9 (100%)               |
| - Swelling                        | 6 (2.4%)               | 6 (100%)               | 0 (0%)                   | -                   | 6 (1.3%)               | 6 (100%)               |
| <b>Systemic/per organ system</b>  | <b>202<br/>(80.5%)</b> | <b>96 (47.5%)</b>      | <b>203<br/>(94.0%)</b>   | <b>89 (43.8%)</b>   | <b>405<br/>(86.7%)</b> | <b>185<br/>(45.7%)</b> |
| - Cardiac disorders               | 4 (1.6%)               | 1 (25%)                | 1 (0.5%)                 | 0 (0%)              | 5 (1.1%)               | 1 (20%)                |
| - Ear disorders                   | 0 (0%)                 | -                      | 3 (1.4%)                 | 0 (0%)              | 3 (0.6%)               | 0 (0%)                 |
| - Endocrine disorders             | 0 (0%)                 | -                      | 1 (0.5%)                 | 0 (0%)              | 1 (0.2%)               | 0 (0%)                 |
| - Gastrointestinal disorders      | 22 (8.8%)              | 6 (27.2%)              | 27 (12.5%)               | 5 (18.5%)           | 49 (10.5%)             | 11 (22.4%)             |
| - General disorders               | 29 (11.5%)             | 23 (79.3%)             | 47 (21.8%)               | 40 (85.1%)          | 76 (16.3%)             | 63 (82.9%)             |
| - Infections and infestations     | 46 (18.3%)             | 9 (19.6%)              | 54 (25.0%)               | 9 (16.7%)           | 100 (1.4%)             | 18 (18.0%)             |
| - Injury                          | 4 (1.6%)               | 0 (0%)                 | 2 (0.9%)                 | 0 (0%)              | 6 (1.3%)               | 0 (0%)                 |
| - Musculoskeletal disorders       | 19 (7.6%)              | 15 (79.0%)             | 8 (3.7%)                 | 3 (37.5%)           | 27 (5.8%)              | 18 (66.7%)             |
| - Nervous system disorders        | 32 (12.7%)             | 30 (93.8%)             | 26 (12.0%)               | 23 (88.5%)          | 58 (12.4%)             | 53 (91.4%)             |
| - Psychiatric disorders           | 3 (1.2%)               | 1 (33.3%)              | 4 (1.9%)                 | 2 (50.0%)           | 7 (1.5%)               | 3 (42.9%)              |
| - Renal and urinary disorders     | 3 (1.2%)               | 0 (0%)                 | 9 (4.2%)                 | 2 (22.2%)           | 12 (2.6%)              | 2 (16.7%)              |
| - Respiratory disorders           | 15 (6.0%)              | 3 (20.0%)              | 7 (3.2%)                 | 2 (28.6%)           | 22 (4.7%)              | 5 (22.7%)              |
| - Skin and subcutaneous disorders | 25 (10.0%)             | 8 (32.0%)              | 13 (6.0%)                | 3 (23.1%)           | 38 (8.1%)              | 11 (28.9%)             |
| - Vascular disorders              | 0 (0%)                 | -                      | 1 (0.5%)                 | 0 (0%)              | 1 (0.2%)               | 0 (0%)                 |
| <b>AE grade<sup>^</sup></b>       |                        |                        |                          |                     |                        |                        |
| - grade 1                         | 193                    | 138                    | 155                      | 97 (62.6%)          | 348                    | 235                    |
| - grade 2                         | (76.9%)                | (71.5%)                | (71.8%)                  | 2 (4.3%)            | (74.5%)                | (67.5%)                |
| - grade 3                         | 52 (20.7%)             | 7 (13.5%)              | 46 (21.3%)               | 3 (23.1%)           | 98 (21.0%)             | 9 (9.2%)               |
| - grade 4                         | 5 (2.0%)               | 0 (0%)                 | 13 (6.0%)                | 0 (0%)              | 18 (3.9%)              | 3 (16.7%)              |
| - grade 5                         | 1 (0.4%)               | 0 (0%)                 | 2 (0.9%)                 | 0 (0%)              | 3 (0.6%)               | 0 (0%)                 |
|                                   | 0 (0%)                 | 0 (0%)                 | 0 (0%)                   |                     | 0 (0%)                 | 0 (0%)                 |
| <b>Serious<sup>^</sup></b>        | 3 (1.2%) <sup>§</sup>  | 0 (0%)                 | 5 (2.3) <sup>&amp;</sup> | 0 (0)               | 9 (1.9%) <sup>@</sup>  | 0 (0%)                 |
| - Death                           | 0 (0%)                 | 0 (0%)                 | 0 (0)                    | 0 (0)               | 0 (0%)                 | 0 (0%)                 |

Data are n (%) or n/N (%). Abbreviations: AE, adverse event; SAE, serious adverse event; qHPV, quadrivalent

human papillomavirus vaccine

\* pain, erythema, swelling during the seven days following vaccination; all injection site adverse experiences were considered vaccine-related.

‡ Vaccine-related adverse events were those determined by the investigator to be possibly, probably, or definitely related to the vaccine.

<sup>§</sup> The three serious adverse events in the qHPV group were: renal insufficiency due to insufficient intake; small myocardial infarction; short-term psychosis after substance abuse

<sup>&</sup> The five serious adverse events in the placebo group were: nephrolithiasis (one participant, two episodes), hip fracture; hepatic encephalopathy and portal vein thrombosis; wound infection after accident in gym

<sup>@</sup> One participant experienced a serious adverse event (tibia fracture) after recruitment but before randomisation
