# Supplementary material for: HPV vaccination to prevent recurrence of anal intraepithelial neoplasia in HIV+ MSM
Source: PubMed Central journal article supplement — AIDS. 2021 May 6;35(11):1753–64. doi: 10.1097/QAD.0000000000002928 (PMC8373452; doi:10.1097/qad.0000000000002928), 2021-05-06
Supplement: aids-35-1753-s005.pdf [file aids-35-1753-s005.pdf]

**Supplementary table 1: Incidence rates and qHPV vaccine efficacy for HGAIN**

| <b>Outcome</b>                                                 | <b>Total</b>                                | <b>qHPV</b>                                 | <b>Placebo</b>                              | <b>Vaccine efficacy</b>    |
|----------------------------------------------------------------|---------------------------------------------|---------------------------------------------|---------------------------------------------|----------------------------|
|                                                                | <i>IR (95% CI) per<br/>100 person-years</i> | <i>IR (95% CI) per<br/>100 person-years</i> | <i>IR (95% CI) per<br/>100 person-years</i> | <i>% (95% CI)</i>          |
| <b>HGAIN (ITT, n=126, 127.1<br/>person-years of follow-up)</b> | 61.4 (49.2–76.6)                            | 66.3 (49.0–89.7)                            | 56.5 (40.7–78.3)                            | -17.4 (-20.3–-14.6)        |
| <b>HGAIN (PP, n=122, 123.7<br/>person-years of follow-up)</b>  | 63.1 (50.5–78.7)                            | 68.2 (50.4–92.3)                            | 58.0 (41.8–80.4)                            | -17.6 (95% CI -20.5–-14.8) |

Abbreviations: CI, confidence interval; IR, incidence rate; ITT, intention-to-treat; LGAIN, low-grade anal

intraepithelial neoplasia; HGAIN, high-grade anal intraepithelial neoplasia; PP, per-protocol; qHPV, quadrivalent

human papillomavirus vaccine
