# Supplementary material for: HPV vaccination to prevent recurrence of anal intraepithelial neoplasia in HIV+ MSM
Source: PubMed Central journal article supplement — AIDS. 2021 May 6;35(11):1753–64. doi: 10.1097/QAD.0000000000002928 (PMC8373452; doi:10.1097/qad.0000000000002928), 2021-05-06
Supplement: aids-35-1753-s006.pdf [file aids-35-1753-s006.pdf]

**Supplementary table 2: Univariable and multivariable determinants of recurrent HGAIN 12 months after last vaccination in the intention-to-treat analysis following a worst-case scenario**

|                                                               | Total          | No recurrent HGAIN | Recurrent HGAIN | Univariable logistic regression |               |                | Multivariable logistic regression |               |                |
|---------------------------------------------------------------|----------------|--------------------|-----------------|---------------------------------|---------------|----------------|-----------------------------------|---------------|----------------|
|                                                               | <i>N (%)</i> * | <i>n (%)</i> *     | <i>n (%)</i> *  | <i>OR</i>                       | <i>95% CI</i> | <i>p-value</i> | <i>aOR</i>                        | <i>95% CI</i> | <i>p-value</i> |
| <b><i>a. Forced variables</i></b>                             |                |                    |                 |                                 |               |                |                                   |               |                |
| <b>Vaccination group</b>                                      |                |                    |                 |                                 |               |                |                                   |               |                |
| Placebo                                                       | 62 (49.2%)     | 24 (38.7%)         | 38 (61.3%)      | REF                             |               | 0.38           | REF                               |               |                |
| qHPV                                                          | 64 (50.8%)     | 20 (31.3%)         | 44 (68.8%)      | 1.39                            | (0.67–2.90)   |                | 1.03                              | (0.32–3.36)   | 0.96           |
| <b>qHPV vs. non-academic</b>                                  |                |                    |                 | 0.54                            | (0.12–2.41)   | 0.42           | 0.34                              | (0.07–1.76)   | 0.20           |
| <b>qHPV vs. vaccination 6-12 months after HGAIN treatment</b> |                |                    |                 | 1.79                            | (0.34–9.28)   | 0.49           | 1.92                              | (0.34–10.79)  | 0.46           |
| <b>qHPV vs. partial remission</b>                             |                |                    |                 | 1.66                            | (0.33–8.41)   | 0.54           | 3.22                              | (0.53–19.53)  | 0.20           |
| <b><i>b. Socio-demographic characteristics</i></b>            |                |                    |                 |                                 |               |                |                                   |               |                |
| <b>Age per 10 years, mean (±SD)</b>                           | 4.9 (±0.9)     | 5.0 (±0.9)         | 4.9 (±1.0)      | 0.94                            | (0.63–1.38)   | 0.74           |                                   |               |                |
| <b>Age categories, years<sup>@</sup></b>                      |                |                    |                 |                                 |               |                |                                   |               |                |
| <44 years                                                     | 40 (31.8%)     | 11 (27.5%)         | 29 (72.5%)      | REF                             |               | 0.47           |                                   |               |                |
| 45-54 years                                                   | 48 (38.1%)     | 19 (39.6%)         | 29 (60.4%)      | 0.58                            | (0.23–1.43)   |                |                                   |               |                |
| ≥55 years                                                     | 38 (30.2%)     | 14 (36.8%)         | 24 (63.2%)      | 0.65                            | (0.25–1.69)   |                |                                   |               |                |
| <b>Smoking status</b>                                         |                |                    |                 |                                 |               |                |                                   |               |                |
| Never                                                         | 52 (41.3%)     | 17 (32.7%)         | 35 (67.3%)      | REF                             |               | 0.30           |                                   |               |                |
| Current                                                       | 33 (26.2%)     | 9 (27.3%)          | 24 (72.7%)      | 1.30                            | (0.50–3.38)   |                |                                   |               |                |
| Previous                                                      | 41 (32.5%)     | 18 (43.9%)         | 23 (56.1%)      | 0.62                            | (0.27–1.45)   |                |                                   |               |                |
| <b><i>c. HIV related characteristics</i></b>                  |                |                    |                 |                                 |               |                |                                   |               |                |
| <b>Years living with HIV, per 10 years, median [IQR]</b>      | 12 [6-17]      | 13 [7.5-19]        | 11.5 [6-16]     | 0.97                            | (0.92–1.02)   | 0.23           |                                   |               |                |
| <b>On cART</b>                                                |                |                    |                 |                                 |               |                |                                   |               |                |
| No                                                            | 2 (1.6%)       | 1 (50.0%)          | 1 (50.0%)       | REF                             |               | 0.66           |                                   |               |                |
| Yes                                                           | 124 (98.4%)    | 43 (34.7%)         | 81 (65.3%)      | 1.88                            | (0.11–30.86)  |                |                                   |               |                |

|                                                         |               |               |               |             |                    |             |             |                    |
|---------------------------------------------------------|---------------|---------------|---------------|-------------|--------------------|-------------|-------------|--------------------|
| <b>Time on cART, per 10 years, median [IQR]</b>         | 9.5 [4-15]    | 10 [4-16]     | 9 [5-15]      | 1.00        | (0.94–1.06)        | 0.88        |             |                    |
| <b>Nadir CD4 count per 100 cells/μl, median [IQR]</b>   | 2.4 [1.5-3.5] | 2.4 [1.7-3.3] | 2.4 [1.4-3.5] | 1.01        | (0.80–1.27)        | 0.93        |             |                    |
| <b>Nadir CD4 count, categories<sup>@,#</sup></b>        |               |               |               |             |                    |             |             |                    |
| <181                                                    | 49 (39.2%)    | 17 (34.7%)    | 32 (65.3%)    | REF         |                    | 0.92        |             |                    |
| 181-310                                                 | 37 (29.6%)    | 14 (37.8%)    | 23 (62.2%)    | 0.87        | (0.36–2.12)        |             |             |                    |
| ≥311                                                    | 39 (31.2%)    | 13 (33.3%)    | 26 (66.7%)    | 1.06        | (0.44–2.58)        |             |             |                    |
| <b>Years since nadir CD4 count, years, median [IQR]</b> | 9 [4-15]      | 8.5 [4-15.5]  | 9 [5-15]      | 1.00        | (0.95–1.06)        | 0.91        |             |                    |
| <b>Current CD4 count per 100 cells/μl, median [IQR]</b> | 7 [5.6-8.8]   | 6.0 [4.9-8.1] | 7.6 [6-8.9]   | <b>1.28</b> | <b>(1.06–1.56)</b> | <b>0.01</b> | <b>1.30</b> | <b>(1.05–1.61)</b> |
| <b>CD4 count, categories<sup>@</sup></b>                |               |               |               |             |                    |             |             |                    |
| <601                                                    | 45 (35.7%)    | 23 (51.1%)    | 22 (48.9%)    | REF         |                    | <b>0.02</b> |             |                    |
| 601-800                                                 | 40 (31.8%)    | 10 (25.0%)    | 30 (75.0%)    | 3.14        | (1.24–7.90)        |             |             |                    |
| ≥801                                                    | 41 (32.5%)    | 11 (26.8%)    | 30 (73.2%)    | 2.85        | (1.15–7.05)        |             |             |                    |
| <b>Plasma HIV-RNA load</b>                              |               |               |               |             |                    |             |             |                    |
| Undetectable (<40 copies/ml)                            | 120 (95.2%)   | 43 (39.2%)    | 77 (64.2%)    | REF         |                    | 0.31        |             |                    |
| Detectable                                              | 6 (4.8%)      | 1 (16.7%)     | 5 (83.3%)     | 2.79        | (0.32–24.68)       |             |             |                    |
| <b>d. STI history</b>                                   |               |               |               |             |                    |             |             |                    |
| <b>Any STI</b>                                          |               |               |               |             |                    |             |             |                    |
| No                                                      | 8 (6.4%)      | 2 (25.0%)     | 6 (75.0%)     | REF         |                    | 0.53        |             |                    |
| Yes                                                     | 118 (93.7%)   | 42 (35.6%)    | 76 (64.4%)    | 0.60        | (0.12–3.12)        |             |             |                    |
| <b>e. Last intra-anal HGAIN treatment</b>               |               |               |               |             |                    |             |             |                    |
| Cryotherapy                                             | 12 (9.5%)     | 6 (50.0%)     | 6 (50.0%)     | &           |                    |             |             |                    |
| Electrocautery                                          | 101 (80.2%)   | 34 (33.7%)    | 67 (66.3%)    |             |                    |             |             |                    |
| TCA                                                     | 4 (3.2%)      | 1 (25.0%)     | 3 (75.0%)     |             |                    |             |             |                    |
| Imiquimod cream                                         | 1 (0.8%)      | 1 (100.0%)    | 0 (0.0%)      |             |                    |             |             |                    |
| Other                                                   | 8 (6.4%)      | 2 (25.0%)     | 6 (75.0%)     |             |                    |             |             |                    |
| <b>f. Genital condylomata<sup>§</sup></b>               |               |               |               |             |                    |             |             |                    |

|                                   |             |            |            |      |              |      |
|-----------------------------------|-------------|------------|------------|------|--------------|------|
| No                                | 120 (96.8%) | 43 (35.8%) | 77 (64.2%) | REF  |              | 0.65 |
| Yes                               | 4 (3.2%)    | 1 (25.0%)  | 3 (75.0%)  | 1.68 | (0.17–16.61) |      |
| <b><i>g. Anal condylomata</i></b> |             |            |            |      |              |      |
| <b>Any</b>                        |             |            |            |      |              |      |
| No                                | 83 (65.9%)  | 30 (36.1%) | 53 (63.9%) | REF  |              | 0.69 |
| Yes                               | 43 (34.1%)  | 14 (32.6%) | 29 (67.4%) | 1.17 | (0.54–2.56)  |      |
| <b>Intra-anal</b>                 |             |            |            |      |              |      |
| No                                | 89 (70.6%)  | 33 (37.1%) | 56 (62.9%) | REF  |              | 0.43 |
| Yes                               | 37 (29.4%)  | 11 (29.7%) | 26 (70.3%) | 1.39 | (0.61–3.18)  |      |
| <b>Peri-anal</b>                  |             |            |            |      |              |      |
| No                                | 116 (92.1%) | 40 (34.5%) | 76 (65.5%) | REF  |              | 0.73 |
| Yes                               | 10 (7.9%)   | 4 (40.0%)  | 6 (60.0%)  | 0.79 | (0.21–2.96)  |      |
| <b><i>h. LGAIN</i></b>            |             |            |            |      |              |      |
| <b>Any</b>                        |             |            |            |      |              |      |
| No                                | 55 (43.7%)  | 17 (30.9%) | 38 (69.1%) | REF  |              | 0.40 |
| Yes                               | 71 (56.4%)  | 27 (38.0%) | 44 (62.0%) | 0.73 | (0.35–1.54)  |      |
| <b>Intra-anal</b>                 |             |            |            |      |              |      |
| No                                | 60 (47.6%)  | 20 (33.3%) | 40 (66.7%) | REF  |              | 0.72 |
| Yes                               | 66 (52.4%)  | 24 (36.4%) | 42 (63.6%) | 0.88 | (0.42–1.82)  |      |
| <b>Peri-anal</b>                  |             |            |            |      |              |      |
| No                                | 119 (94.4%) | 41 (34.5%) | 78 (65.6%) | REF  |              | 0.65 |
| Yes                               | 7 (5.6%)    | 3 (42.9%)  | 4 (57.1%)  | 0.70 | (0.15–3.28)  |      |

Data are n (%), median [IQR], mean ( $\pm$ SD). Abbreviations: AIN, anal intraepithelial neoplasia; aOR, adjusted odds ratio; cART, combination antiretroviral therapy; CI, confidence interval; IQR, interquartile range; LGAIN, low-grade anal intraepithelial neoplasia; HIV, human immunodeficiency virus; HGAIN, high-grade anal intraepithelial neoplasia; ml, milliliter;  $\mu$ l, microliter; OR, odds ratio; REF, reference; SD, standard deviation; STI, sexually transmitted infection; TCA, trichloroacetic acid; qHPV, quadrivalent human papillomavirus vaccine

\* Unless otherwise indicated

@ In tertiles

# 1 missing

§ 2 missing

& Excluded from analysis due to 0 observations in one or multiple categories
