# Supplementary material for: HPV vaccination to prevent recurrence of anal intraepithelial neoplasia in HIV+ MSM
Source: PubMed Central journal article supplement — AIDS. 2021 May 6;35(11):1753–64. doi: 10.1097/QAD.0000000000002928 (PMC8373452; doi:10.1097/qad.0000000000002928), 2021-05-06
Supplement: aids-35-1753-s007.pdf [file aids-35-1753-s007.pdf]

**Supplementary table 3: Univariable and multivariable determinants of recurrent HGAIN 12 months after last vaccination in the intention-to-treat analysis following a best-case scenario**

|                                                               | Total                    | No recurrent HGAIN       | Recurrent HGAIN          | Univariable logistic regression |               |                | Multivariable logistic regression |               |                |
|---------------------------------------------------------------|--------------------------|--------------------------|--------------------------|---------------------------------|---------------|----------------|-----------------------------------|---------------|----------------|
|                                                               | <i>N (%)<sup>a</sup></i> | <i>n (%)<sup>a</sup></i> | <i>n (%)<sup>a</sup></i> | <i>OR</i>                       | <i>95% CI</i> | <i>p-value</i> | <i>aOR</i>                        | <i>95% CI</i> | <i>p-value</i> |
| <b><i>a. Forced variables</i></b>                             |                          |                          |                          |                                 |               |                |                                   |               |                |
| <b>Vaccination group</b>                                      |                          |                          |                          |                                 |               |                |                                   |               |                |
| Placebo                                                       | 62 (49.2%)               | 26 (41.9%)               | 36 (58.1%)               | REF                             |               | 0.38           | REF                               |               |                |
| qHPV                                                          | 64 (50.8%)               | 22 (34.4%)               | 42 (65.5%)               | 1.38                            | (0.67–2.84)   |                | 1.18                              | (0.37–3.77)   | 0.78           |
| <b>qHPV vs. non-academic</b>                                  |                          |                          |                          | 0.54                            | (0.12–2.38)   | 0.42           | 0.40                              | (0.08–2.00)   | 0.26           |
| <b>qHPV vs. vaccination 6-12 months after HGAIN treatment</b> |                          |                          |                          | 1.81                            | (0.35–9.29)   | 0.48           | 1.95                              | (0.35–11.00)  | 0.45           |
| <b>qHPV vs. partial remission</b>                             |                          |                          |                          | 1.14                            | (0.23–5.55)   | 0.87           | 1.92                              | (0.33–11.08)  | 0.47           |
| <b><i>b. Socio-demographic characteristics</i></b>            |                          |                          |                          |                                 |               |                |                                   |               |                |
| <b>Age per 10 years, mean (±SD)</b>                           | 4.9 (0.9±)               | 4.9 (0.9±)               | 4.9 (1.0±)               | 0.99                            | (0.68–1.45)   | 0.97           |                                   |               |                |
| <b>Age categories, years<sup>@</sup></b>                      |                          |                          |                          |                                 |               |                |                                   |               |                |
| <44 years                                                     | 40 (31.8%)               | 13 (32.5%)               | 27 (67.5%)               | REF                             |               | 0.66           |                                   |               |                |
| 45-54 years                                                   | 48 (38.1%)               | 20 (41.7%)               | 28 (58.3%)               | 0.67                            | (0.28–1.62)   |                |                                   |               |                |
| ≥55 years                                                     | 38 (30.2%)               | 15 (39.5%)               | 23 (60.5%)               | 0.74                            | (0.29–1.87)   |                |                                   |               |                |
| <b>Smoking status</b>                                         |                          |                          |                          |                                 |               |                |                                   |               |                |
| Never                                                         | 52 (41.3%)               | 18 (34.6%)               | 34 (60.4%)               | REF                             |               | 0.21           |                                   |               |                |
| Current                                                       | 33 (26.2%)               | 10 (30.3%)               | 23 (69.7%)               | 1.22                            | (0.48–3.11)   |                |                                   |               |                |
| Previous                                                      | 41 (32.5%)               | 20 (48.8%)               | 21 (51.2%)               | 0.56                            | (0.24–1.28)   |                |                                   |               |                |
| <b><i>c. HIV related characteristics</i></b>                  |                          |                          |                          |                                 |               |                |                                   |               |                |
| <b>Years living with HIV, per 10 years, median [IQR]</b>      | 12 [6-17]                | 13 [6.5-19]              | 11.5 [6-16]              | 0.97                            | (0.93–1.03)   | 0.31           |                                   |               |                |
| <b>On cART</b>                                                |                          |                          |                          |                                 |               |                |                                   |               |                |
| No                                                            | 2 (1.6%)                 | 1 (50.0%)                | 1 (50.0%)                | REF                             |               | 0.73           |                                   |               |                |
| Yes                                                           | 124 (98.4%)              | 47 (37.9%)               | 77 (62.1%)               | 1.64                            | (0.10–26.82)  |                |                                   |               |                |

|                                                         |               |               |               |             |                    |             |             |                    |             |
|---------------------------------------------------------|---------------|---------------|---------------|-------------|--------------------|-------------|-------------|--------------------|-------------|
| <b>Time on cART, per 10 years, median [IQR]</b>         | 9.5 [4-15]    | 9 [4-16]      | 10 [5-15]     | 1.00        | (0.94–1.06)        | 0.98        |             |                    |             |
| <b>Nadir CD4 count per 100 cells/μl, median [IQR]</b>   | 2.4 [1.5-3.5] | 2.4 [1.7-3.3] | 2.4 [1.4-3.5] | 1.02        | (0.82–1.28)        | 0.86        |             |                    |             |
| <b>Nadir CD4 count, categories<sup>@,#</sup></b>        |               |               |               |             |                    |             |             |                    |             |
| <181                                                    | 49 (39.2%)    | 19 (38.8%)    | 30 (61.2%)    | REF         |                    | 0.91        |             |                    |             |
| 181-310                                                 | 37 (29.6%)    | 15 (40.5%)    | 22 (59.5%)    | 0.93        | (0.39–2.22)        |             |             |                    |             |
| ≥311                                                    | 39 (31.2%)    | 14 (35.9%)    | 25 (64.1%)    | 1.13        | (0.47–2.70)        |             |             |                    |             |
| <b>Years since nadir CD4 count, years, median [IQR]</b> | 9 [4-15]      | 8.5 [4-15.5]  | 9 [5-15]      | 1.01        | (0.95–1.07)        | 0.86        |             |                    |             |
| <b>Current CD4 count per 100 cells/μl, median [IQR]</b> | 7 [5.6-8.8]   | 6.2 [5-8.1]   | 7.5 [6-8.9]   | <b>1.25</b> | <b>(1.04–1.51)</b> | <b>0.02</b> | <b>1.24</b> | <b>(1.01–1.52)</b> | <b>0.04</b> |
| <b>CD4 count, categories<sup>@</sup></b>                |               |               |               |             |                    |             |             |                    |             |
| <601                                                    | 45 (35.7%)    | 24 (53.3%)    | 21 (46.7%)    | REF         |                    | <b>0.03</b> |             |                    |             |
| 601-800                                                 | 40 (31.8%)    | 12 (30.0%)    | 28 (70.0%)    | 2.67        | (1.09–6.52)        |             |             |                    |             |
| ≥801                                                    | 41 (32.5%)    | 12 (29.3%)    | 29 (70.7%)    | 2.76        | (1.13–6.74)        |             |             |                    |             |
| <b>Plasma HIV-RNA load</b>                              |               |               |               |             |                    |             |             |                    |             |
| Undetectable (<40 copies/ml)                            | 120 (95.2%)   | 47 (39.2%)    | 73 (60.8%)    | REF         |                    | 0.24        |             |                    |             |
| Detectable                                              | 6 (4.8%)      | 1 (16.7%)     | 5 (83.3%)     | 3.22        | (0.36–28.42)       |             |             |                    |             |
| <b>d. STI history</b>                                   |               |               |               |             |                    |             |             |                    |             |
| <b>Any STI</b>                                          |               |               |               |             |                    |             |             |                    |             |
| No                                                      | 8 (6.4%)      | 2 (25.0%)     | 6 (75.0%)     | REF         |                    | 0.42        |             |                    |             |
| Yes                                                     | 118 (93.7%)   | 46 (39.0%)    | 72 (61.0%)    | 0.52        | (0.10–2.70)        |             |             |                    |             |
| <b>e. Last intra-anal HGAIN treatment</b>               |               |               |               |             |                    |             |             |                    |             |
| Cryotherapy                                             | 12 (9.5%)     | 6 (50.0%)     | 6 (50.0%)     | &           |                    |             |             |                    |             |
| Electrocautery                                          | 101 (80.2%)   | 38 (37.6%)    | 63 (62.4%)    |             |                    |             |             |                    |             |
| TCA                                                     | 4 (3.2%)      | 1 (25.0%)     | 3 (75.0%)     |             |                    |             |             |                    |             |
| Imiquimod cream                                         | 1 (0.8%)      | 1 (100.0%)    | 0 (0.0%)      |             |                    |             |             |                    |             |
| Other                                                   | 8 (6.4%)      | 2 (25.0%)     | 6 (75.0%)     |             |                    |             |             |                    |             |
| <b>f. Genital condylomata<sup>§</sup></b>               |               |               |               |             |                    |             |             |                    |             |

|                                   |             |            |            |      |              |      |
|-----------------------------------|-------------|------------|------------|------|--------------|------|
| No                                | 120 (96.8%) | 47 (39.2%) | 73 (60.8%) | REF  |              | 0.56 |
| Yes                               | 4 (3.2%)    | 1 (25.0%)  | 3 (75.0%)  | 1.93 | (0.20–19.12) |      |
| <b><i>g. Anal condylomata</i></b> |             |            |            |      |              |      |
| <b>Any</b>                        |             |            |            |      |              |      |
| No                                | 83 (65.9%)  | 34 (41.0%) | 49 (59.0%) | REF  |              | 0.35 |
| Yes                               | 43 (34.1%)  | 14 (32.6%) | 29 (67.4%) | 1.44 | (0.66–3.12)  |      |
| <b>Intra-anal</b>                 |             |            |            |      |              |      |
| No                                | 89 (70.6%)  | 37 (41.6%) | 52 (58.4%) | REF  |              | 0.21 |
| Yes                               | 37 (29.4%)  | 11 (29.7%) | 26 (70.3%) | 1.68 | (0.74–3.82)  |      |
| <b>Peri-anal</b>                  |             |            |            |      |              |      |
| No                                | 116 (92.1%) | 44 (37.9%) | 72 (62.1%) | REF  |              | 0.90 |
| Yes                               | 10 (7.9%)   | 4 (40.0%)  | 6 (60.0%)  | 0.92 | (0.24–3.43)  |      |
| <b><i>h. LGAIN</i></b>            |             |            |            |      |              |      |
| <b>Any</b>                        |             |            |            |      |              |      |
| No                                | 55 (43.7%)  | 19 (34.6%) | 36 (65.5%) | REF  |              | 0.47 |
| Yes                               | 71 (56.4%)  | 29 (40.9%) | 42 (59.2%) | 0.76 | (0.37–1.59)  |      |
| <b>Intra-anal</b>                 |             |            |            |      |              |      |
| No                                | 60 (47.6%)  | 22 (36.7%) | 38 (63.3%) | REF  |              | 0.75 |
| Yes                               | 66 (52.4%)  | 26 (39.4%) | 40 (60.6%) | 0.89 | (0.43–1.83)  |      |
| <b>Peri-anal</b>                  |             |            |            |      |              |      |
| No                                | 119 (94.4%) | 45 (37.8%) | 74 (62.2%) | REF  |              | 0.79 |
| Yes                               | 7 (5.6%)    | 3 (42.9%)  | 4 (57.1%)  | 0.81 | (0.17–3.79)  |      |

Data are n (%), median [IQR], mean ( $\pm$ SD). Abbreviations: AIN, anal intraepithelial neoplasia; aOR, adjusted odds ratio; cART, combination antiretroviral therapy; CI, confidence interval; IQR, interquartile range; LGAIN, low-grade anal intraepithelial neoplasia; HIV, human immunodeficiency virus; HGAIN, high-grade anal intraepithelial neoplasia; ml, milliliter;  $\mu$ l, microliter; OR, odds ratio; REF, reference; SD, standard deviation; STI, sexually transmitted infection; TCA, trichloroacetic acid; qHPV, quadrivalent human papillomavirus vaccine

\* Unless otherwise indicated

@ In tertiles

# 1 missing

§ 2 missing

& Excluded from analysis due to 0 observations in one or multiple categories
