# Supplementary material for: HPV vaccination to prevent recurrence of anal intraepithelial neoplasia in HIV+ MSM
Source: PubMed Central journal article supplement — AIDS. 2021 May 6;35(11):1753–64. doi: 10.1097/QAD.0000000000002928 (PMC8373452; doi:10.1097/qad.0000000000002928), 2021-05-06
Supplement: aids-35-1753-s008.pdf [file aids-35-1753-s008.pdf]

**Supplementary table 4. Univariable and multivariable determinants of recurrent HGAIN 12 months after last vaccination in the per-protocol analysis**

|                                                               | Total            | No recurrent HGAIN | Recurrent HGAIN  | Univariable logistic regression |               |                | Multivariable logistic regression |               |                |
|---------------------------------------------------------------|------------------|--------------------|------------------|---------------------------------|---------------|----------------|-----------------------------------|---------------|----------------|
|                                                               | <i>N (%)</i> *   | <i>n (%)</i> *     | <i>n (%)</i> *   | <i>OR</i>                       | <i>95% CI</i> | <i>p-value</i> | <i>aOR</i>                        | <i>95% CI</i> | <i>p-value</i> |
| <b>a. Forced variables</b>                                    |                  |                    |                  |                                 |               |                |                                   |               |                |
| <b>Vaccination group</b>                                      |                  |                    |                  |                                 |               |                |                                   |               |                |
| Placebo                                                       | 60 (49.2%)       | 24 (40.0%)         | 36 (60.0%)       | REF                             |               | 0.38           | REF                               |               |                |
| qHPV                                                          | 62 (50.8%)       | 20 (32.3%)         | 42 (67.7%)       | 1.40                            | (0.67–2.94)   |                | 1.08                              | (0.33–3.50)   | 0.90           |
| <b>qHPV vs. non-academic</b>                                  |                  |                    |                  | 0.54                            | (0.12–2.46)   | 0.43           | 0.35                              | (0.07–1.88)   | 0.22           |
| <b>qHPV vs. vaccination 6-12 months after HGAIN treatment</b> |                  |                    |                  | 1.78                            | (0.34–9.31)   | 0.49           | 1.96                              | (0.34–11.25)  | 0.45           |
| <b>qHPV vs. partial remission</b>                             |                  |                    |                  | 1.45                            | (0.28–7.47)   | 0.66           | 2.77                              | (0.44–17.35)  | 0.28           |
| <b>b. Socio-demographic characteristics</b>                   |                  |                    |                  |                                 |               |                |                                   |               |                |
| <b>Age per 10 years, mean (<math>\pm</math>SD)</b>            | 4.9 ( $\pm$ 1.0) | 5.0 ( $\pm$ 0.9)   | 4.9 ( $\pm$ 1.0) | 0.96                            | (0.65–1.41)   | 0.82           |                                   |               |                |
| <b>Age categories, years<sup>@</sup></b>                      |                  |                    |                  |                                 |               |                |                                   |               |                |
| <44 years                                                     | 38 (31.2%)       | 11 (29.0%)         | 27 (71.1%)       | REF                             |               | 0.52           |                                   |               |                |
| 45-54 years                                                   | 47 (38.5%)       | 19 (40.4%)         | 28 (59.6%)       | 0.60                            | (0.24–1.49)   |                |                                   |               |                |
| $\geq$ 55 years                                               | 37 (30.3%)       | 14 (37.8%)         | 23 (62.2%)       | 0.67                            | (0.25–1.76)   |                |                                   |               |                |
| <b>Smoking status</b>                                         |                  |                    |                  |                                 |               |                |                                   |               |                |
| Never                                                         | 51 (41.8%)       | 17 (33.3%)         | 34 (66.7%)       | REF                             |               | 0.25           |                                   |               |                |
| Current                                                       | 32 (26.2%)       | 9 (28.1%)          | 23 (71.9%)       | 1.28                            | (0.49–3.36)   |                |                                   |               |                |
| Previous                                                      | 39 (32.0%)       | 18 (46.2%)         | 21 (53.9%)       | 0.58                            | (0.25–1.38)   |                |                                   |               |                |
| <b>c. HIV related characteristics</b>                         |                  |                    |                  |                                 |               |                |                                   |               |                |
| <b>Years living with HIV, per 10 years, median [IQR]</b>      | 12 [6-17]        | 13 [7.5-19]        | 11.5 [6-16]      | 0.97                            | (0.92–1.02)   | 0.25           |                                   |               |                |
| <b>On cART</b>                                                |                  |                    |                  |                                 |               |                |                                   |               |                |
| No                                                            | 2 (1.6%)         | 1 (50.0%)          | 1 (50.0%)        | REF                             |               | 0.69           |                                   |               |                |
| Yes                                                           | 120 (98.4%)      | 43 (35.8%)         | 77 (64.2%)       | 1.79                            | (0.11–29.35)  |                |                                   |               |                |

|                                                         |               |               |               |             |                    |             |             |                    |             |
|---------------------------------------------------------|---------------|---------------|---------------|-------------|--------------------|-------------|-------------|--------------------|-------------|
| <b>Time on cART, per 10 years, median [IQR]</b>         | 10 [4-15]     | 10 [4-16]     | 10 [5-15]     | 1.00        | (0.94–1.06)        | 0.92        |             |                    |             |
| <b>Nadir CD4 count per 100 cells/μl, median [IQR]</b>   | 2.4 [1.5-3.5] | 2.4 [1.7-3.3] | 2.4 [1.4-3.5] | 1.01        | (0.81–1.27)        | 0.90        |             |                    |             |
| <b>Nadir CD4 count, categories<sup>@,#</sup></b>        |               |               |               |             |                    |             |             |                    |             |
| <181                                                    | 47 (38.8%)    | 17 (36.2%)    | 30 (63.8%)    | REF         |                    | 0.92        |             |                    |             |
| 181-310                                                 | 36 (29.8%)    | 14 (38.9%)    | 22 (61.1%)    | 0.89        | (0.36–2.18)        |             |             |                    |             |
| ≥311                                                    | 38 (31.4%)    | 13 (34.2%)    | 25 (65.8%)    | 1.09        | (0.44–2.67)        |             |             |                    |             |
| <b>Years since nadir CD4 count, years, median [IQR]</b> | 9 [4-15]      | 8.5 [4-15.5]  | 9 [5-15]      | 1.00        | (0.95–1.07)        | 0.89        |             |                    |             |
| <b>Current CD4 count per 100 cells/μl, median [IQR]</b> | 6.9 [5.5-8.8] | 6.0 [4.9-8.1] | 7.5 [6-8.9]   | <b>1.28</b> | <b>(1.05–1.55)</b> | <b>0.01</b> | <b>1.28</b> | <b>(1.03–1.58)</b> | <b>0.02</b> |
| <b>CD4 count, categories<sup>@</sup></b>                |               |               |               |             |                    |             |             |                    |             |
| <601                                                    | 44 (36.1%)    | 23 (52.3%)    | 21 (47.7%)    | REF         |                    | <b>0.02</b> |             |                    |             |
| 601-800                                                 | 38 (31.2%)    | 10 (26.3%)    | 28 (73.7%)    | 3.07        | (1.21–7.80)        |             |             |                    |             |
| ≥801                                                    | 40 (32.8%)    | 11 (27.5%)    | 29 (72.5%)    | 2.89        | (1.16–7.19)        |             |             |                    |             |
| <b>Plasma HIV-RNA load</b>                              |               |               |               |             |                    |             |             |                    |             |
| Undetectable (<40 copies/ml)                            | 116 (95.1%)   | 43 (37.1%)    | 73 (62.9%)    | REF         |                    | 0.28        |             |                    |             |
| Detectable                                              | 6 (4.9%)      | 1 (16.7%)     | 5 (83.3%)     | 2.95        | (0.33–26.05)       |             |             |                    |             |
| <b>d. STI history</b>                                   |               |               |               |             |                    |             |             |                    |             |
| <b>Any STI</b>                                          |               |               |               |             |                    |             |             |                    |             |
| No                                                      | 8 (6.6%)      | 2 (25.0%)     | 6 (75.0%)     | REF         |                    | 0.49        |             |                    |             |
| Yes                                                     | 114 (93.4%)   | 42 (36.8%)    | 72 (63.2%)    | 0.57        | (0.11–2.96)        |             |             |                    |             |
| <b>e. Last intra-anal HGAIN treatment</b>               |               |               |               |             |                    |             |             |                    |             |
| Cryotherapy                                             | 12 (9.8%)     | 6 (50.0%)     | 6 (50.0%)     | &           |                    |             |             |                    |             |
| Electrocautery                                          | 97 (79.5%)    | 34 (35.1%)    | 63 (65.0%)    |             |                    |             |             |                    |             |
| TCA                                                     | 4 (3.3%)      | 1 (25.0%)     | 3 (75.0%)     |             |                    |             |             |                    |             |
| Imiquimod cream                                         | 1 (0.8%)      | 1 (100.0%)    | 0 (0.0%)      |             |                    |             |             |                    |             |
| Other                                                   | 8 (6.6%)      | 2 (25.0%)     | 6 (75.0%)     |             |                    |             |             |                    |             |
| <b>f. Genital condylomata<sup>§</sup></b>               |               |               |               |             |                    |             |             |                    |             |

|                                   |             |            |            |      |              |      |
|-----------------------------------|-------------|------------|------------|------|--------------|------|
| No                                | 116 (96.7%) | 43 (37.1%) | 73 (62.9%) | REF  |              | 0.61 |
| Yes                               | 4 (3.3%)    | 1 (25.0%)  | 3 (75.0%)  | 1.77 | (0.18–17.53) |      |
| <b><i>g. Anal condylomata</i></b> |             |            |            |      |              |      |
| <b>Any</b>                        |             |            |            |      |              |      |
| No                                | 79 (64.8%)  | 30 (38.0%) | 49 (62.0%) | REF  |              | 0.55 |
| Yes                               | 43 (35.3%)  | 14 (32.6%) | 29 (67.4%) | 1.27 | (0.58–2.78)  |      |
| <b>Intra-anal</b>                 |             |            |            |      |              |      |
| No                                | 85 (69.7%)  | 33 (38.8%) | 52 (61.2%) | REF  |              | 0.33 |
| Yes                               | 37 (30.3%)  | 11 (29.7%) | 26 (70.3%) | 1.50 | (0.65–3.44)  |      |
| <b>Peri-anal</b>                  |             |            |            |      |              |      |
| No                                | 112 (91.8%) | 40 (35.7%) | 72 (64.3%) | REF  |              | 0.79 |
| Yes                               | 10 (8.2%)   | 4 (40.0%)  | 6 (60.0%)  | 0.83 | (0.22–3.13)  |      |
| <b><i>h. LGAIN</i></b>            |             |            |            |      |              |      |
| <b>Any</b>                        |             |            |            |      |              |      |
| No                                | 53 (43.4%)  | 17 (32.1%) | 36 (67.9%) | REF  |              | 0.42 |
| Yes                               | 69 (56.6%)  | 27 (39.1%) | 42 (60.9%) | 0.73 | (0.35–1.56)  |      |
| <b>Intra-anal</b>                 |             |            |            |      |              |      |
| No                                | 58 (47.5%)  | 20 (34.5%) | 38 (65.5%) | REF  |              | 0.73 |
| Yes                               | 64 (52.5%)  | 24 (37.5%) | 40 (62.5%) | 0.88 | (0.42–1.84)  |      |
| <b>Peri-anal</b>                  |             |            |            |      |              |      |
| No                                | 115 (94.3%) | 41 (35.7%) | 74 (64.4%) | REF  |              | 0.70 |
| Yes                               | 7 (5.7%)    | 3 (42.9%)  | 4 (57.1%)  | 0.74 | (0.16–3.46)  |      |

Data are n (%), median [IQR], mean ( $\pm$ SD). Abbreviations: AIN, anal intraepithelial neoplasia; aOR, adjusted odds ratio; cART, combination antiretroviral therapy; CI, confidence interval; IQR, interquartile range; LGAIN, low-grade anal intraepithelial neoplasia; HIV, human immunodeficiency virus; HGAIN, high-grade anal intraepithelial neoplasia; ml, milliliter;  $\mu$ l, microliter; OR, odds ratio; REF, reference; SD, standard deviation; STI, sexually transmitted infection; TCA, trichloroacetic acid; qHPV, quadrivalent human papillomavirus vaccine

\* Unless otherwise indicated

@ In tertiles

# 1 missing

§ 2 missing

& Excluded from analysis due to 0 observations in one or multiple categories
