# Supplementary material for: HPV vaccination to prevent recurrence of anal intraepithelial neoplasia in HIV+ MSM
Source: PubMed Central journal article supplement — AIDS. 2021 May 6;35(11):1753–64. doi: 10.1097/QAD.0000000000002928 (PMC8373452; doi:10.1097/qad.0000000000002928), 2021-05-06
Supplement: aids-35-1753-s009.pdf [file aids-35-1753-s009.pdf]

**Supplementary table 5: Difference in antibody concentrations before first (*pre*) and 3 months after last vaccination (*post*) per HPV type, *p*-values**

|              | <b>qHPV group</b> | <b>Placebo group</b> |
|--------------|-------------------|----------------------|
| <b>HPV6</b>  | <0.0001           | 0.70                 |
| <b>HPV11</b> | <0.0001           | 0.17                 |
| <b>HPV16</b> | 0.0002            | 0.11                 |
| <b>HPV18</b> | <0.0001           | 0.51                 |
| <b>HPV31</b> | 0.0093            | 0.36                 |
| <b>HPV33</b> | 0.08              | 0.44                 |
| <b>HPV45</b> | 0.022             | 0.87                 |
| <b>HPV52</b> | 0.06              | 0.95                 |
| <b>HPV58</b> | 0.06              | 0.38                 |

Paired t-test for all comparisons

Abbreviation: HPV, human papillomavirus; qHPV, quadrivalent human papillomavirus vaccine
