# Supplementary material for: HPV vaccination to prevent recurrence of anal intraepithelial neoplasia in HIV+ MSM
Source: PubMed Central journal article supplement — AIDS. 2021 May 6;35(11):1753–64. doi: 10.1097/QAD.0000000000002928 (PMC8373452; doi:10.1097/qad.0000000000002928), 2021-05-06
Supplement: aids-35-1753-s010.pdf [file aids-35-1753-s010.pdf]

**Supplementary table 6: Participants above seropositivity threshold before first (*pre*) and 3 months after last vaccination (*post*) per HPV type**

|                             | HPV16          |                 | HPV18          |                 | HPV31          |                | HPV33          |                | HPV45          |                | HPV52          |                | HPV58          |                |
|-----------------------------|----------------|-----------------|----------------|-----------------|----------------|----------------|----------------|----------------|----------------|----------------|----------------|----------------|----------------|----------------|
|                             | <i>pre</i>     | <i>post</i>     | <i>pre</i>     | <i>post</i>     | <i>pre</i>     | <i>post</i>    | <i>pre</i>     | <i>post</i>    | <i>pre</i>     | <i>post</i>    | <i>pre</i>     | <i>post</i>    | <i>pre</i>     | <i>post</i>    |
| <b>qHPV group (n=64)</b>    | 42/64<br>(66%) | 64/64<br>(100%) | 45/64<br>(70%) | 64/64<br>(100%) | 31/64<br>(48%) | 50/64<br>(78%) | 30/64<br>(47%) | 49/64<br>(77%) | 33/64<br>(52%) | 56/64<br>(88%) | 20/64<br>(31%) | 38/64<br>(59%) | 19/64<br>(30%) | 45/64<br>(70%) |
| <b>Placebo group (n=62)</b> | 42/62<br>(68%) | 48/62<br>(77%)  | 43/62<br>(69%) | 40/62<br>(65%)  | 20/62<br>(32%) | 16/62<br>(26%) | 29/62<br>(47%) | 34/62<br>(55%) | 34/62<br>(55%) | 35/62<br>(56%) | 16/62<br>(26%) | 15/62<br>(24%) | 20/62<br>(32%) | 18/62<br>(29%) |

Data are n/N (%). No seropositivity thresholds are available for HPV6 and 11.

Abbreviation: HPV, human papillomavirus; qHPV, quadrivalent human papillomavirus vaccine
