# Supplementary material for: HPV vaccination to prevent recurrence of anal intraepithelial neoplasia in HIV+ MSM
Source: PubMed Central journal article supplement — AIDS. 2021 May 6;35(11):1753–64. doi: 10.1097/QAD.0000000000002928 (PMC8373452; doi:10.1097/qad.0000000000002928), 2021-05-06
Supplement: aids-35-1753-s011.pdf [file aids-35-1753-s011.pdf]

## Supplementary figure 1

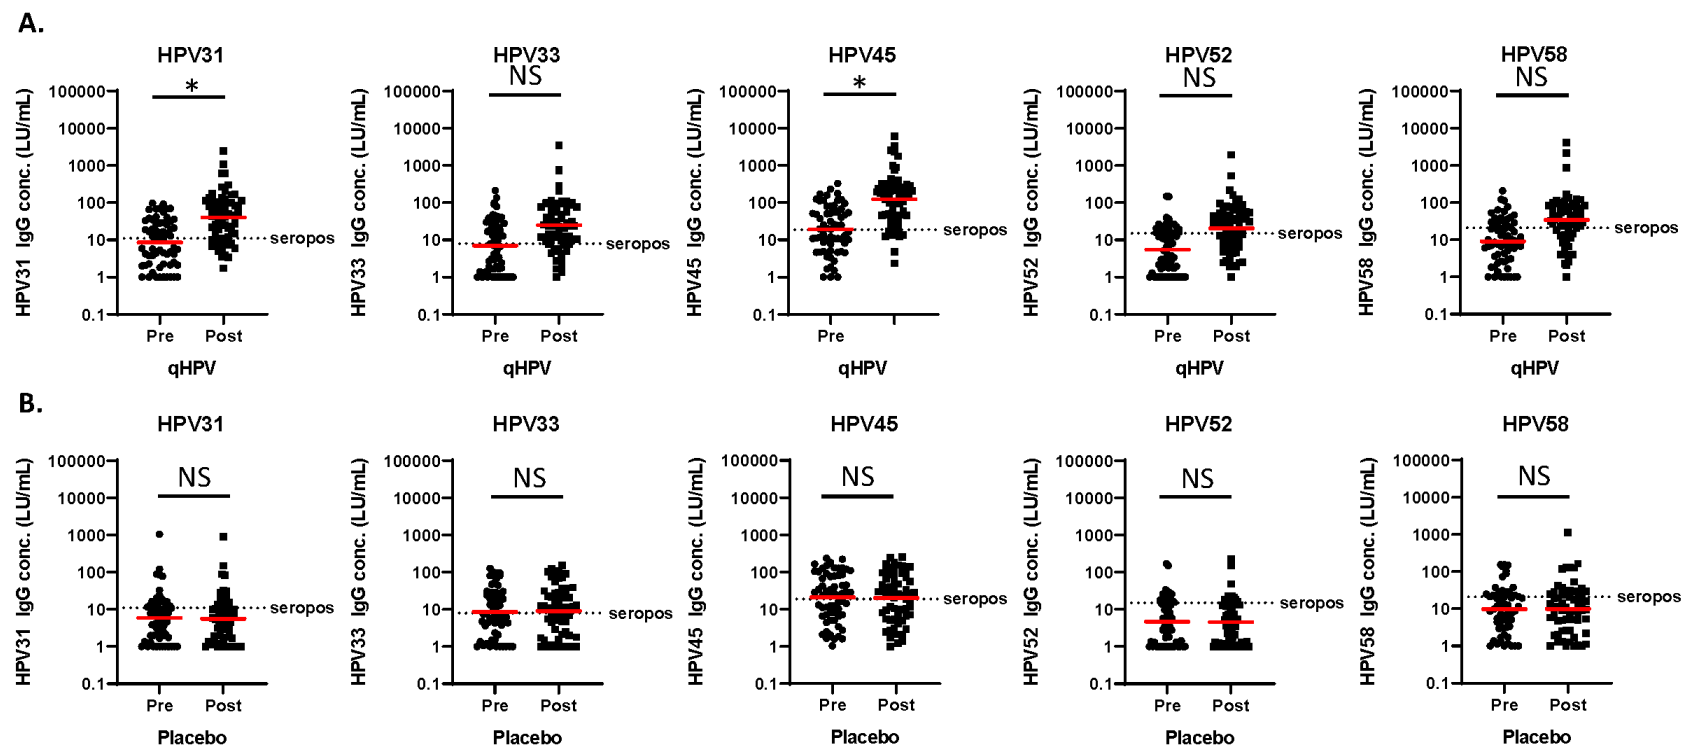

HPV type-specific IgG antibody concentrations for non-vaccine types (HPV31, 33, 45, 52, 58) before first (pre) and 3 months after last vaccination (post)

A. qHPV group, B. placebo group. Units: LU/mL. Red bars represent geometric mean concentrations. Dotted line/seropos: seropositivity thresholds: 11 LU/mL (HPV31), 8 LU/mL (HPV33), 19 LU/mL (HPV45), 15 LU/mL (HPV52), 21 LU/mL (HPV58). \* :  $p < 0.01$ ; NS : non-significant ( $p > 0.05$ ) (paired t-test).

Abbreviations: HPV, human papillomavirus; IgG, Immunoglobulin; qHPV, quadrivalent HPV vaccine; LU/ml, Luminex units per ml.
